# Supplementary material
Source: PubMed Central journal article supplement (PMC3910728)
Supplement: AAC.00972-13_zac001142470so1.pdf [file AAC.00972-13_zac001142470so1.pdf]

A

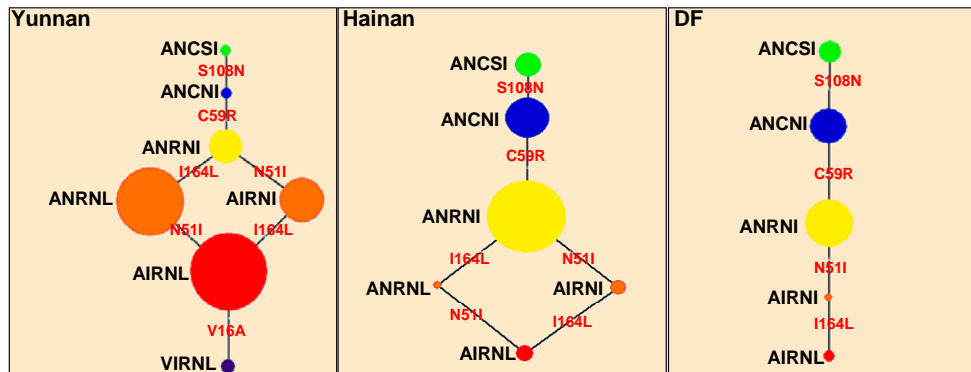

B

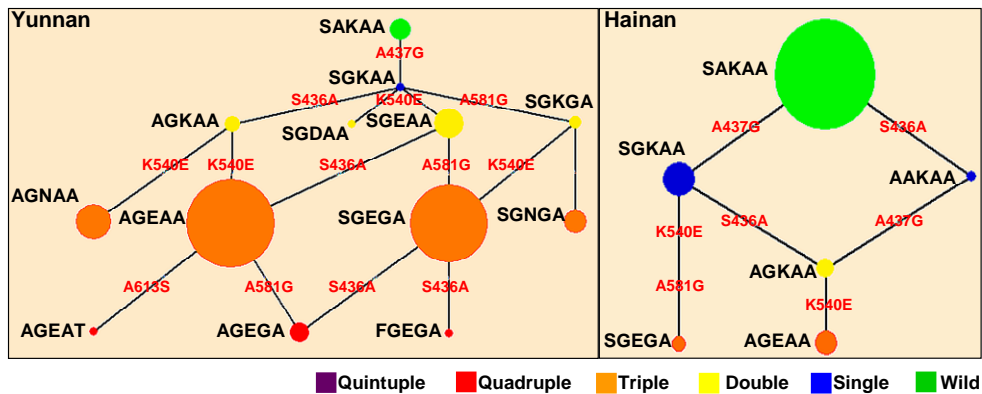

**FIG S1 Evolutionary pathway of the drug resistance-conferring mutations in *pfdhfr* and *pfdhps* genes in southern China.** The network diagram shows the evolution of the drug resistant *pfdhfr* (A) and *pfdhps* (B) alleles with respect to the site-mutations in the genes. The size of the circle is proportional to the number of isolates with a particular allele. The lines represent evolutionary steps connecting individual SNP haplotypes shown in different colors.

**TABLE S1 Geographical distribution of *P. falciparum dhfr* and *dhps* resistant alleles in southern China**

| Resistance Genes | No. of mutations    | DHFR/DHPS Alleles   | Yunnan Province |                |                   |                   | Hainan Province |                  |               |                   |
|------------------|---------------------|---------------------|-----------------|----------------|-------------------|-------------------|-----------------|------------------|---------------|-------------------|
|                  |                     |                     | Lazan<br>n=60   | Dehong<br>n=78 | Tengchong<br>n=92 | Total<br>N=230(%) | Ledong<br>n=37  | Dongfang<br>n=50 | Sanya<br>n=32 | Total<br>N=119(%) |
| DHFR alleles     | 5                   | <b><u>VIRNL</u></b> |                 |                | 3                 | 1.30              |                 |                  |               | 0.00              |
|                  | 4                   | <b><u>AIRNL</u></b> | 33              | 30             | 44                | 46.52             |                 | 2                | 1             | 2.52              |
|                  | 3                   | <b><u>ANRNL</u></b> | 19              | 33             | 19                | 30.87             |                 |                  | 1             | 0.84              |
|                  |                     | <b><u>AIRNI</u></b> | 4               | 10             | 18                | 13.91             |                 | 3                |               | 2.52              |
|                  | 2                   | <b><u>ANRNI</u></b> | 4               | 5              | 7                 | 6.96              | 35              | 16               | 29            | 67.23             |
|                  | 1                   | <b><u>ANCNI</u></b> |                 |                |                   | 0.00              | 1               | 21               | 1             | 19.33             |
|                  | 0                   | <b><u>ANCSI</u></b> |                 |                | 1                 | 0.44              | 1               | 8                |               | 7.56              |
| DHPS alleles     | 4                   | <b><u>AGEGA</u></b> |                 | 1              | 4                 | 2.17              |                 |                  |               | 0.00              |
|                  |                     | <b><u>FGEGA</u></b> |                 |                | 1                 | 0.44              |                 |                  |               | 0.00              |
|                  |                     | <b><u>AGEAT</u></b> |                 |                | 1                 | 0.44              |                 |                  |               | 0.00              |
|                  | 3                   | <b><u>AGNAA</u></b> | 3               | 3              | 9                 | 6.52              |                 |                  |               | 0.00              |
|                  |                     | <b><u>AGEAA</u></b> | 30              | 36             | 41                | 46.52             | 3               | 1                | 1             | 4.21              |
|                  |                     | <b><u>SGEGA</u></b> | 19              | 29             | 25                | 31.74             |                 | 1                | 1             | 1.68              |
|                  |                     | <b><u>SGNGA</u></b> | 2               | 3              | 1                 | 2.61              |                 |                  |               | 0.00              |
|                  | 2                   | <b><u>SGEAA</u></b> | 3               | 2              | 6                 | 4.78              |                 |                  |               | 0.00              |
|                  |                     | <b><u>SGDAA</u></b> |                 |                | 1                 | 0.44              |                 |                  |               | 0.00              |
|                  |                     | <b><u>AGKAA</u></b> | 1               |                | 1                 | 0.87              |                 | 2                | 1             | 2.52              |
|                  |                     | <b><u>SGKGA</u></b> | 1               |                | 1                 | 0.87              |                 |                  |               | 0.00              |
|                  | 1                   | <b><u>AAKAA</u></b> |                 |                |                   | 0.00              |                 |                  | 1             | 0.84              |
|                  |                     | <b><u>SGKAA</u></b> | 1               |                |                   | 0.44              | 5               | 5                |               | 8.4               |
| 0                | <b><u>SAKAA</u></b> |                     | 4               | 1              | 2.17              | 29                | 41              | 28               | 82.35         |                   |

Note: only alleles from single infection are presented in this table. Mutant amino acids are in bold and underlined.
